# Supplementary material
Source: Springer Nature journal article supplement (https://www.springermedizin.de/resource/supplementary/13054_2012_1674_MOESM3_ESM.pdf/9711164)

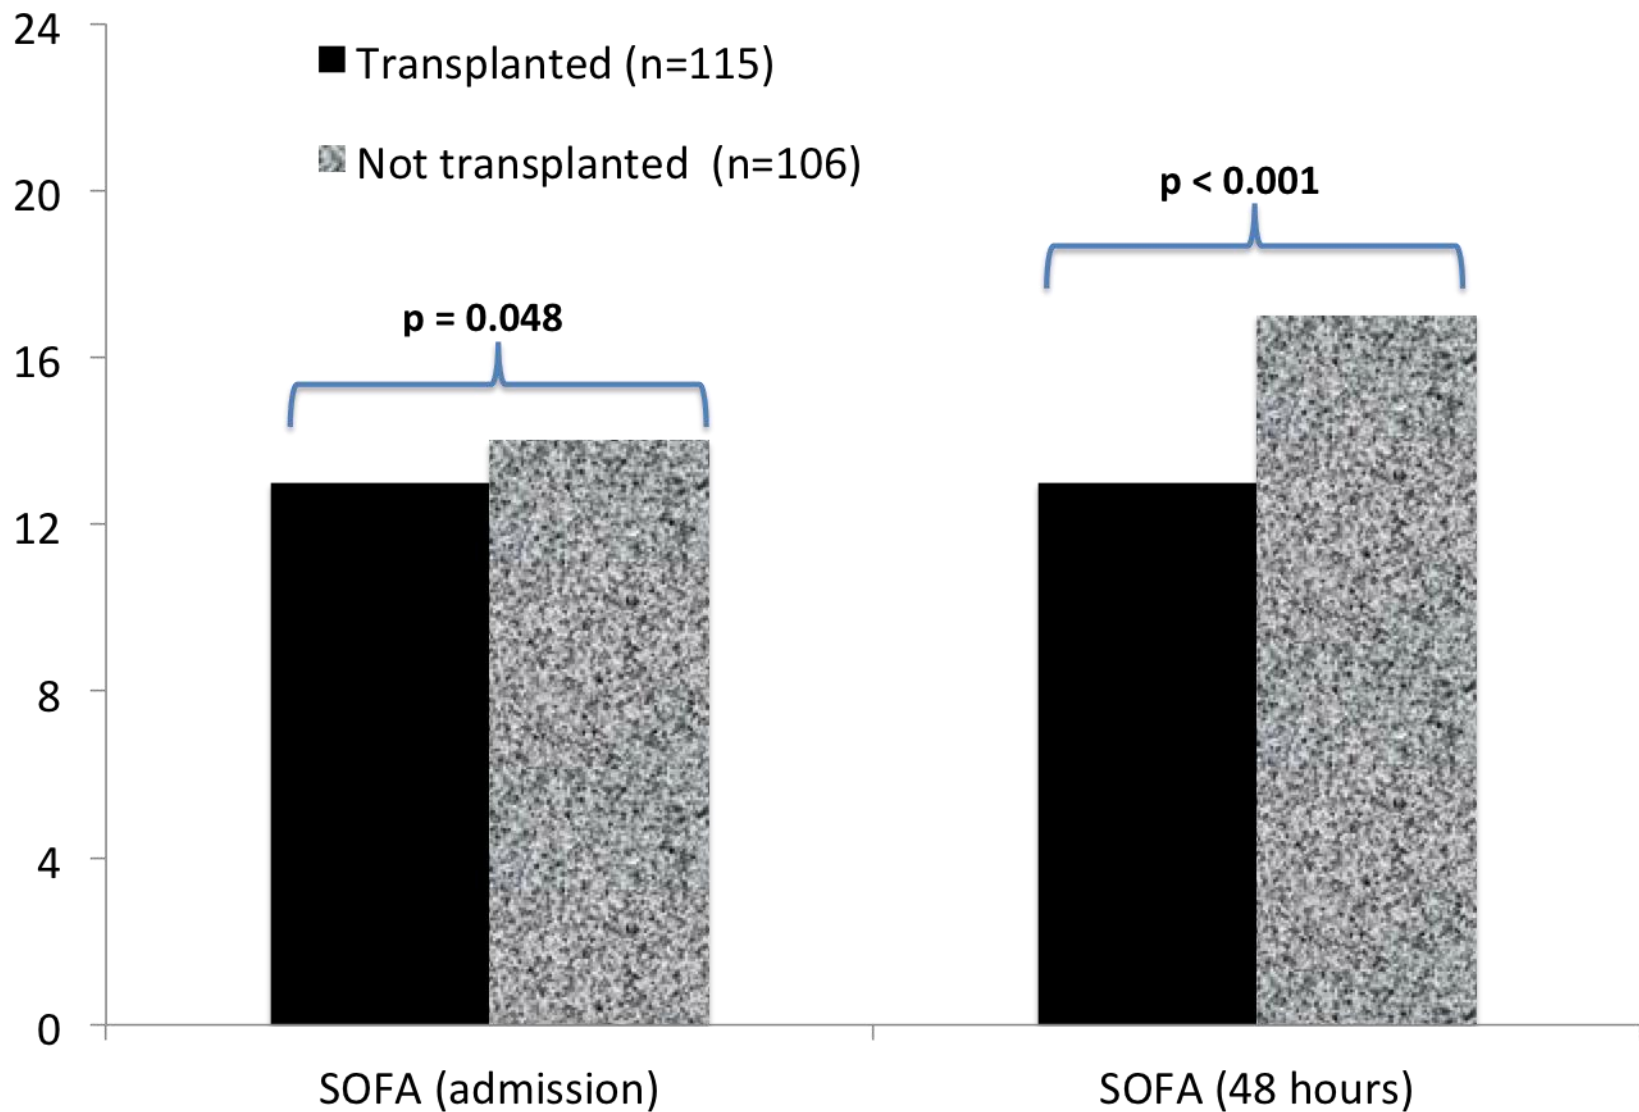

Supplement: MOESM3 [file 9711164]
